# Supplementary material
Source: publisher site journal article supplement (https://www.dovepress.com/article/supplementary_file/555681/555681%20Revised%20Supplemental%20Tables%201-5.docx)
Supplement: Supplementary file 1 [file 555681%20Revised%20Supplemental%20Tables%201-5.docx]

**Supplemental Materials**

# **Supplemental Table 1. Diagnosis and procedure codes to identify patients with shoulder disorders and to classify them into subgroups**

| Description | Type of code | Codes | Detailed description of the code |
| --- | --- | --- | --- |
| Non-specific shoulder disorder diagnosis | ICD-9 | 719.41 | Pain in joint, shoulder region |
| 718.81 | Other joint derangement, not elsewhere classified, shoulder region |
| 718.91 | Unspecified derangement of joint, shoulder region |
| 719.61 | Other symptoms referable to joint, shoulder region |
| 719.81 | Other specified disorders of joint, shoulder region |
| 719.91 | Unspecified disorder of joint, shoulder region |
| 726.2 | Other affections of shoulder region, not elsewhere classified |
| ICD-10 | M25.51[1/2/9]  Or M25.51x | Pain in [right/left/unspecified] shoulder |
| M24.81[1/2/9]  Or M24.81x | Other specific joint derangements of [right/left/unspecified] shoulder, not elsewhere classified |
| M67.91[1/2/9]  Or M67.91x | Unspecified disorder of synovium and tendon, [right/left/unspecified] shoulder |
| M70.81[1/2/9]  Or M70.81x | Other soft tissue disorders related to use, overuse and pressure, [right/left/unspecified] shoulder |
| M70.91[1/2/9]  Or M70.91x | Unspecified soft tissue disorder related to use, overuse and pressure, [right/left/unspecified] shoulder |
| M75.8[0/1/2]  Or M75.8x | Other shoulder lesions, [unspecified/right/left] shoulder |
| M75.9[0/1/2]  Or M75.9x | Shoulder lesion, unspecified, [unspecified/right/left] shoulder |
| S43.40[1/2/9][A/D/S]  Or S43.40x | Unspecified sprain of [right/left/unspecified] shoulder joint, [initial/subsequent/sequela] encounter |
| S43.49[1/2/9][A/D/S]  Or S43.49x | Other sprain of [right/left/unspecified shoulder joint, [initial/subsequent/sequela] encounter |
| Rotator cuff/sub-acromial pain | ICD-9 | 726.1x | Rotator Cuff Syndrome |
| 727.61 | Nontraumatic rupture of rotator cuff |
| 840.30 | Infraspinatus (muscle) (tendon) sprain |
| 840.4 | Rotator cuff (capsule) sprain |
| 840.5 | Subscapularis (muscle) sprain |
| 840.6 | Supraspinatus (muscle) (tendon) sprain |
| ICD-10 | M62.01[1/2/9]  Or M62.01x | Separation of muscle (nontraumatic),  [right/left/unspecified] shoulder |
| M62.11[1/2/9]  Or M62.11x | Other rupture of muscle (nontraumatic), [right/left/unspecified] shoulder |
| M71.81[1/2/9]  Or M71.81x | Other specified bursopathies, [right/left/unspecified] shoulder |
| M75.1[0/1/2][0/1/2]  Or M75.1x | [Unspecified/incomplete/complete] rotator cuff tear or rupture of [unspecified/right/left] shoulder, not specified as traumatic |
| M75.2[0/1/2]  Or M75.2x | Bicipital tendinitis, [unspecified/right/left] shoulder |
| M75.3[0/1/2]  Or M75.3x | Calcific tendinitis, [unspecified/right/left] shoulder |
| M75.4[0/1/2]  Or M75.4x | Impingement syndrome of [unspecified/right/left] shoulder |
| M75.5[0/1/2]  Or M75.5x | Bursitis of [unspecified/right/left] shoulder |
| S43.42[1/2/9][A/D/S]  Or S43.42x | Sprain of [right/left/unspecified] rotator cuff capsule, [initial/subsequent/sequela] encounter |
| S46.00[1/2/9][A/D/S]  Or S46.0x | Unspecified injury of muscle(s) and tendon(s) of the rotator cuff of [right/left/unspecified] shoulder, [initial/subsequent/sequela] encounter |
| S46.01[1/2/9][A/D/S]  Or S46.0x | Strain of muscle(s) and tendon(s) of the rotator cuff of [right/left/unspecified]shoulder, [initial/subsequent/sequela] encounter |
| S46.02[1/2/9][A/D/S]  Or S46.0x | Laceration of muscle(s) and tendon(s) of the rotator cuff of [right/left/unspecified]shoulder, [initial/subsequent/sequela] encounter |
| S46.09[1/2/9][A/D/S]  Or S46.0x | Other injury of muscle(s) and tendon(s) of the rotator cuff of [right/left/unspecified]shoulder, [initial/subsequent/sequela] encounter |
| Acromioclavicular (AC joint) dysfunction | ICD-9 | 831.04 | Closed dislocation of acromioclavicular (joint) |
| 840.0 | Acromioclavicular (joint) (ligament) sprain |
| 840.1 | Coracoclavicular (ligament) sprain |
| ICD-10 | S43.10[1/2/9][A/D/S]  Or S43.1x | Unspecified dislocation of [right/left/unspecified] acromioclavicular joint, [initial/subsequent/sequela] encounter |
| S43.11[1/2/9][A/D/S]  Or S43.1x | Subluxation of [right/left/unspecified] acromioclavicular joint, [initial/subsequent/ sequela] encounter |
| S43.12[1/2/9][A/D/S]  Or S43.1x | Dislocation of [right/left/unspecified] acromioclavicular joint, 100%-200%,  [initial/subsequent/ sequela] encounter |
| S43.13[1/2/9][A/D/S]  Or S43.1x | Dislocation of [right/left/unspecified] acromioclavicular joint, greater than 200% displacement, [initial/subsequent/Sequela] encounter |
| S43.14[1/2/9][A/D/S]  Or S43.1x | Inferior dislocation of [right/left/unspecified] acromioclavicular joint, [initial/subsequent/ sequela] encounter |
| S43.15[1/2/9][A/D/S]  Or S43.1x | Posterior dislocation of [right/left/unspecified] acromioclavicular joint, [initial/subsequent/sequela] encounter |
| S43.5[0/1/2]X[A/D/S]  Or S43.5x | Sprain of [right/left/unspecified] acromioclavicular joint, [initial/subsequent/ sequela] encounter |
| Shoulder instability/dislocation | ICD-9 | 718.21 | Pathological dislocation of joint, shoulder region |
| 718.31 | Recurrent dislocation of joint, shoulder region |
| 831.0x, except for 831.04 | Closed dislocation of shoulder |
| ICD-10 | M24.31[1/2/9]  Or M24.31x | Pathological dislocation of [right/left/unspecified] shoulder, not elsewhere classified |
| M24.41[1/2/9]  Or M24.41x | Recurrent dislocation, [right/left/unspecified] shoulder |
| M25.21[1/2/9]  Or M25.21x | Flail joint, [right/left/unspecified] shoulder |
| M25.31[1/2/9]  Or M25.31x | Other instability, [right/left/unspecified] shoulder |
| S43.00[1/2/3][A/D/S]  Or S43.0x | Unspecified subluxation of [right/left/unspecified] shoulder joint, [initial/subsequent/sequela] encounter |
| S43.00[4/5/6][A/D/S]  Or S43.0x | Unspecified dislocation of [right/left/unspecified] shoulder joint, [initial/subsequent/sequela] encounter |
| S43.01[1/2/3][A/D/S]  Or S43.0x | Anterior subluxation of [right/left/unspecified] humerus, [initial/subsequent/sequela] encounter |
| S43.01[4/5/6][A/D/S]  Or S43.0x | Anterior dislocation of [right/left/unspecified] humerus, [initial/subsequent/sequela] encounter |
| S43.02[1/2/3][A/D/S]  Or S43.0x | Posterior subluxation of [right/left/unspecified] humerus, [initial/subsequent/sequela] encounter |
| S43.02[4/5/6][A/D/S]  Or S43.0x | Posterior dislocation of [right/left/unspecified] humerus, [initial/subsequent/sequela] encounter |
| S43.03[1/2/3][A/D/S]  Or S43.0x | Inferior subluxation of [right/left/unspecified] humerus, [initial/subsequent/sequela] encounter |
| S43.03[4/5/6][A/D/S]  Or S43.0x | Inferior dislocation of [right/left/unspecified] humerus, [initial/subsequent/sequela] encounter |
| S43.08[1/2/3][A/D/S]  Or S43.0x | Other subluxation of [right/left/unspecified] humerus, [initial/subsequent/sequela] encounter |
| S43.08[4/5/6][A/D/S]  Or S43.0x | Other dislocation of [right/left/unspecified] humerus, [initial/subsequent/sequela] encounter |
| S43.30[1/2/3][A/D/S]  Or S43.3x | Subluxation of unspecified parts of [right/left/unspecified] shoulder girdle, [initial/subsequent/sequela] encounter |
| S43.30[4/5/6][A/D/S]  Or S43.3x | Dislocation of unspecified parts of [right/left/unspecified] shoulder girdle, [initial/subsequent/sequela] encounter |
| S43.31[1/2/3][A/D/S]  Or S43.3x | Subluxation of [right/left/unspecified] scapula, [initial/subsequent/sequela] encounter |
| S43.31[4/5/6][A/D/S]  Or S43.3x | Dislocation of [right/left/unspecified] scapula, [initial/subsequent/sequela] encounter |
| S43.39[1/2/3][A/D/S]  Or S43.3x | Subluxation of other parts of [right/left/unspecified] shoulder girdle, [initial/subsequent/sequela] encounter |
| S43.39[4/5/6][A/D/S]  Or S43.3x | Dislocation of other parts of [right/left/unspecified]shoulder girdle, [initial/subsequent/sequela] encounter |
| CPT | 23520 | Closed treatment of sternoclavicular dislocation; without manipulation |
| 23525 | Closed treatment of sternoclavicular dislocation; with manipulation |
| 23530 | Open treatment of sternoclavicular dislocation, acute or chronic |
| 23532 | Open treatment of sternoclavicular dislocation, acute or chronic; with fascial graft (includes obtaining graft) |
| 23540 | Closed treatment of AC dislocation; without manipluation |
| 23545 | Closed treatment of AC dislocation; with manipluation |
| 23550 | Open treatment of AC dislocation, acute or chronic |
| 23552 | Open treatment of AC dislocation, acute or chronic; with fascial graft |
| 23650 | Closed treatment of shoulder dislocation, with manipulation; without anesthesia |
| 23655 | Closed treatment of shoulder dislocation, with manipulation; requiring anesthesia |
| 23660 | Open treatment of acute shoulder dislocation |
| 23665 | Closed treatment of shoulder dislocation, with fracture of greater humeral tuberosity, with manipulation |
| 23670 | Open treatment of shoulder dislocation, with fracture of greater humeral tuberosity, includes internal fixation, when performed |
| 23675 | Closed treatment of shoulder dislocation, with surgical or anatomical neck fracture, with manipulation |
| 23680 | Open treatment of shoulder dislocation, with surgical or anatomical neck fracture, includes internal fixation, when performed |
| Hypomobilitiy/adhesive capsulitis | ICD-9 | 718.41 | Contracture of joint, shoulder region |
| 718.51 | Ankylosis of joint, shoulder region |
| 719.51 | Stiffness of joint, not elsewhere classified, shoulder region |
| 726.0 | Adhesive capsulitis of shoulder |
| ICD-10 | M24.51[1/2/9]  Or M24.51x | Contracture, [right/left/unspecified] shoulder |
| M24.61[1/2/9]  Or M24.61x | Ankylosis, [right/left/unspecified] shoulder |
| M25.61[1/2/9]  Or M25.61x | Stiffness of [right/left/unspecified] shoulder, not elsewhere classified |
| M75.0[0/1/2]  Or M75.0x | Adhesive capsulitis of [unspecified/right/left] shoulder |
| Osteoarthritis (describer, if patients only had non-specific shoulder diagnosis codes plus osteoarthritis codes then exclude such patients) | ICD-9 | 715.11 | Osteoarthrosis, localized, primary, shoulder region |
| 715.21 | Osteoarthrosis, localized, secondary, shoulder region |
| 715.31 | Osteoarthrosis, localized, not specified whether primary or secondary, shoulder region |
| 715.91 | Osteoarthrosis, unspecified whether generalized or localized, shoulder region |
| ICD-10 | M19.01[1/2/9]  Or M19.01x | Primary osteoarthritis, [right/left/unspecified] shoulder |
| M19.11[1/2/9]  Or M19.11x | Post-traumatic osteoarthritis, [right/left/unspecified]shoulder |
| M19.21[1/2/9]  Or M19.21x | Secondary osteoarthritis, [right/left/unspecified] shoulder |
| M25.71[1/2/9]  Or M25.71x | Osteophyte, [right/left/unspecified] shoulder |
| Open dislocation of shoulder (exclusion criterion) | ICD-9 | 831.1x | Open dislocation of shoulder |
| Trauma (exclusion criterion) | ICD-9 | E800-E999 | Accidents, accidental poisoning, misadventures during surgical or medical care,  See description here:  http://www.icd9data.com/2015/Volume1/E000-E999/default.htm |
| ICD-10 | V00-Y99 | See description here:  https://www.icd10data.com/ICD10CM/Codes/V00-Y99 |
| Shoulder or humerus fracture (exclusion criterion) | ICD-9 | 810.0x | Closed fracture of clavicle |
| 810.1x | Open fracture of clavicle |
| 811.0x | Closed fracture of scapula |
| 811.1x | Open fracture of scapula |
| 812.x | Fracture of humerus |
| 733.11 | Pathologic fracture of humerus |
| ICD-10 | S42.0x | Fracture of clavicle |
| S42.1x | Fracture of scapula |
| S42.2x | Fracture of upper end of humerus |
| S42.3x | Fracture of shaft of humerus |
| S42.4x | Fracture of lower end of humerus |
| S42.9x | Fracture of shoulder girdle, part unspecified |
| S49.0x | Physeal fracture of upper end of humerus |
| S49.1x | Physeal fracture of lower end of humerus |
| M84.31x | Stress fracture, shoulder |
| M84.32x | Stress fracture, humerus |
| M84.41x | Pathological fracture, shoulder |
| M84.42x | Pathological fracture, humerus |
| M84.51x | Pathological fracture in neoplastic disease, shoulder |
| M84.52x | Pathological fracture in neoplastic disease, humerus |
| M84.61x | Pathological fracture in other disease, shoulder |
| M84.62x | Pathological fracture in other disease, humerus |
| Amputation (exclusion criterion) | ICD-9 | 887.x | Traumatic amputation of arm and hand (complete) (partial) |
| ICD-10 | S48.x | Traumatic amputation of shoulder and upper arm |
| S58.x | Traumatic amputation of elbow and forearm |
| S68.4x | Traumatic amputation of hand at wrist level |
| S68.7x | Traumatic transmetacarpal amputation of hand |

# **Supplemental Table 2. Procedure codes and therapeutic classes for HCRU**

| Description | Type of code | Codes | Detailed description of the code |
| --- | --- | --- | --- |
| NSAIDS | AHFS therapeutic class | 280804 | Nonsteroidal anti‐inflammatory agents |
| Analgesics | AHFS therapeutic class | 280400 | General anesthetics |
| 280404 | General anesthetics/Barbiturates |
| 280492 | General anesthetics, miscellaneous |
| 280800 | Analgesics and antipyretics |
| 280892 | Analgesics and antipyretics, misc. |
| Muscle relaxers | AHFS therapeutic class | 122000 | Skeletal muscle relaxants |
| 122004 | Centrally acting skeletal muscle relaxnt |
| 122008 | Direct‐acting skeletal muscle relaxants |
| 122012 | Gaba‐derivative skeletal muscle relaxant |
| 122092 | Skeletal muscle relaxants, miscellaneous |
| Opioid | AHFS therapeutic class | 280808 | Opiate agonists |
| 280812 | Opiate partial agonists |
| Benzodiazepines | AHFS therapeutic class | 281208 | Benzodiazepines (anticonvulsants) |
| 282408 | Benzodiazepines (anxiolytic,sedativ/hyp) |
| Pain injection | CPT | 20600 | Arthrocentesis, aspiration and/or injection, small joint or bursa (eg, fingers, toes); without ultrasound guidance |
| 20604 | Arthrocentesis, aspiration and/or injection, small joint or bursa (eg, fingers, toes); with ultrasound guidance, with permanent recording and reporting |
| 20605 | Arthrocentesis, aspiration and/or injection, intermediate joint or bursa (eg, temporomandibular, acromioclavicular, wrist, elbow or ankle, olecranon bursa); without ultrasound guidance |
| 20606 | Arthrocentesis, aspiration and/or injection, intermediate joint or bursa (eg, temporomandibular, acromioclavicular, wrist, elbow or ankle, olecranon bursa); with ultrasound guidance, with permanent recording and reporting |
| 20610 | Arthrocentesis, aspiration and/or injection, major joint or bursa (eg, shoulder, hip, knee, subacromial bursa) without ultrasound guidance |
| 20611 | Arthrocentesis, aspiration and/or injection, major joint or bursa (eg, shoulder, hip, knee, subacromial bursa) with ultrasound guidance |
| 20612 | Aspiration and/or injection of ganglion cyst(s) any location |
| 20615 | Aspiration and injection for treatment of bone cyst |
| Physical Therapy | CPT | 97001 | Physical therapy evaluation |
| 97002 | Physical therapy re-evaluation for significant change in patient’s progress/plan of care |
| 97161 | Low complexity physical therapy evaluation of a new patient with no personal factors or comorbidities that affect the plan of care. |
| 97162 | Moderate complexity physical therapy evaluation. |
| 97163 | High complexity physical therapy evaluation. |
| 97164 | Physical therapy re-evaluation of an established plan of care. |
| ICD-9 | V571 | Care involving other physical therapy. |
| HIPAASPC | 225100000X | Physical Therapist: Respiratory, Developmental, Rehabilitative and Restorative Service Providers |
| 2251C2600X | Cardiopulmonary Physical Therapist |
| 2251E1300X | Clinical Electrophysiology Physical Therapist |
| 2251E1200X | Ergonomics Physical Therapist |
| 2251G0304X | Geriatric Physical Therapist |
| 2251H1200X | Hand Physical Therapist |
| 2251H1300X | Human Factors Physical Therapist |
| 2251N0400X | Neurology Physical Therapist |
| 2251P0200X | Pediatric Physical Therapist |
| 2251S0007X | Sports Physical Therapist |
| 2251X0800X | Orthopedic Physical Therapist |
| 225200000X | Physical Therapy Assistant |
| Active or exercise rehabilitation | CPT | 97110 | Therapeutic procedure, one or more areas, each 15 minutes; therapeutic exercises to develop strength and endurance, range of motion and flexibility |
| 97112 | Therapeutic procedure, one or more areas, each 15 minutes; neuromuscular reeducation of movement, balance, coordination, kinesthetic sense, posture, and/or proprioception for sitting and/or standing activities |
| 97113 | Therapeutic procedure, one or more areas, each 15 minutes; aquatic therapy with therapeutic exercise |
| 97116 | Therapeutic procedure, one or more areas, each 15 minutes; gait training (includes stair climbing) |
| 97150 | Therapeutic procedure(s), group (2 or more individuals) |
| 97530 | Therapeutic activities, direct (one-on-one) patient contact by the provider (use of dynamic activities to improve functional performance), each 15 minutes |
| 97537 | Community/work reintegration training (eg, shopping, transportation, money management, avocational activities and/or work environment/modification analysis, work task analysis, use of assistive technology device/adaptive equipment), direct one-on-one contact, each 15 minutes |
| 97542 | wheel chair management |
| 97545 | Work hardening/conditioning, initial 2 hours |
| 97546 | Work hardening/conditioning, each additional hour |
| 97750 | Physical performance test |
| Passive rehabilitation | CPT | 97010 | Application of hot/cold pack to one or more areas |
| 97014 | Application of modality to one or more areas; electrical stimulation (unattended) |
| 97016 | Application of a vasopneumatic device to an extremity for the purpose of reducing edema, or swelling |
| 97026 | Application of infrared light therapy to specific body areas to reduce pain, increase joint mobility, promote circulation, and aid in healing. |
| 97028 | Application of ultraviolet rays on one or more body parts to treat certain skin ailments |
| 97032 | Application of a modality to one or more areas; electrical stimulation (manual) |
| 97033 | Administration of iontophoresis, which uses electric current to deliver medicine through skin; one unit of this code represents one 15 minute session |
| 97035 | Application of modality to help strengthen, relax, and heal muscles from their strained conditions |
| HCPCS | G0283 | Electrical stimulation other than wound |
| Manual therapy | CPT | 97140 | Manual therapy techniques (e.g., mobilization/manipulation, manual lymphatic draining, manual traction), one or more regions, each 15 minutes |
| 98925-98929 | Osteopathic Manipulation |
| 98940-98942 | Chiropractic manipulative treatment (CMT) |
| 98943 | Chiro, manipulation, extraspinal, one or more regions |
| Acupuncture | CPT | 97780 | acupuncture, one or more needles; without electrical stimulation |
| 97781 | acupuncture, one or more needles; with electrical stimulation |
| 97810 | Acupuncture, one or more needles; without electrical stimulation, initial 15 minutes of personal one-on- one contact with the patient |
| 97811 | Acupuncture, one or more needles; without electrical stimulation, each additional 15 minutes of personal one-on-one contact with the patient,  with reinsertion of needle(s) (list separately in addition to code for primary procedure) |
| 97813 | Acupuncture, one or more needles; with electrical stimulation, initial 15 minutes of personal one-on-one contact with the patient |
| 97814 | Acupuncture, one or more needles; with electrical stimulation, each additional 15 minutes of personal one- on-one contact with the patient,  with reinsertion of needle(s) (list separately in addition to code for primary procedure) |
| X-ray | CPT | 73000 | Radiologic examination, clavicle, complete |
| 73010 | Radiologic examination, scapula, complete |
| 73020 | Radiologic examination, shoulder; 1 view |
| 73030 | Radiologic examination, shoulder; complete, minimum of 2 views |
| 73050 | Radiolgic examination; acromioclavicular joints, bilateral, with or without weighted distraction |
| 73060 | Radiolgic examination; humerus, minimum of 2 views |
| ICD-9-PCS | 88.21 | Skeletal x-ray of shoulder and upper arm |
| ICD-10-PCS | BP03ZZZ | Plain Radiography of Bilateral Acromioclavicular Joints |
| BP0[8/9][0/1/Y]ZZ  Or BP0x | Plain Radiography of [Right/Left] Shoulder using [High Osmolar/Low Osmolar/Other] Contrast |
| BP0[8/9]ZZZ  Or BP0x | Plain Radiography of [Right/Left] Shoulder |
| MRI | CPT | 73218 | MRI, upper extremity, other than joint; without contrast material(s) |
| 73219 | MRI, upper extremity, other than joint; with contrast material(s) |
| 73220 | MRI, upper extremity, other than joint; without contrast material(s), followed by contrast material(s) and further sequences |
| 73221 | MRI, any joint of upper extremity; without contrast material(s) |
| 73222 | MRI, any joint of upper extremity; with contrast material(s) |
| 73223 | MRI, any joint of upper extremity; without contrast material(s), followed by contrast material(s) and further sequences |
| 73225 | Magnetic resonance angiography, upper extremity, with or without contrast material(s) |
| Arthrogram | CPT | 73040 | Radiologic examination, shoulder, arthrography, radiological supervision and interpretation |
| CT scan | CPT | 73200 | CT, upper extremity, without contrast material |
| 73201 | CT, upper extremity, with contrast material(s) |
| 73202 | CT, upper extremity, without contrast material, followed by contrast material(s) and further sections |
| 73206 | CT, angiography, upper extremity, with contrast material(s), including noncontrast images, if performed, and image postprocessing |

# **Supplemental Table 3. Demographic Characteristics by Clinic Type**

|  | Civilian (N=193637) | Military (N=262604) | Total (N=456241) |
| --- | --- | --- | --- |
| **Diagnostic Group** |  |  |  |
| Rotator Cuff | 43292 (22.4%) | 41406 (15.8%) | 84698 (18.6%) |
| AC Joint | 1601 (0.8%) | 2412 (0.9%) | 4013 (0.9%) |
| Instability/Dislocation | 2494 (1.3%) | 4593 (1.7%) | 7087 (1.6%) |
| Hypomobility/Adhesive Capsulitis | 6236 (3.2%) | 4948 (1.9%) | 11184 (2.5%) |
| Osteoarthrosis | 8791 (4.5%) | 5142 (2.0%) | 13933 (3.1%) |
| Non-Specific Diagnosis | 111363 (57.5%) | 194401 (74.0%) | 305764 (67.0%) |
| More than 1 Specific Disease | 19860 (10.3%) | 9702 (3.7%) | 29562 (6.5%) |
|  |  |  |  |
| **Patient Sex** |  |  |  |
| Missing | 0 (0.0%) | 65723 (25.0%) | 65723 (14.4%) |
| Female | 97658 (50.4%) | 58047 (22.1%) | 155705 (34.1%) |
| Male | 95979 (49.6%) | 138834 (52.9%) | 234813 (51.5%) |
|  |  |  |  |
| **Patient Age** |  |  |  |
| Mean (SD) | 45.60 (12.68) | 37.84 (12.33) | 41.13 (13.06) |
| Median | 48.0 | 36.0 | 41.0 |
| Q1, Q3 | 36.0, 56.0 | 27.0, 47.0 | 30.0, 52.0 |
| Range | (17.0-65.0) | (17.0-65.0) | (17.0-65.0) |
|  |  |  |  |
| **Index Date Year** |  |  |  |
| 2013 | 242 (0.1%) | 91 (0.0%) | 333 (0.1%) |
| 2014 | 55642 (28.7%) | 27939 (10.6%) | 83581 (18.3%) |
| 2015 | 29547 (15.3%) | 38883 (14.8%) | 68430 (15.0%) |
| 2016 | 33964 (17.5%) | 67727 (25.8%) | 101691 (22.3%) |
| 2017 | 30904 (16.0%) | 60368 (23.0%) | 91272 (20.0%) |
| 2018 | 29630 (15.3%) | 53865 (20.5%) | 83495 (18.3%) |
| 2019 | 13708 (7.1%) | 13731 (5.2%) | 27439 (6.0%) |
|  |  |  |  |
| **Patient Beneficiary Category** |  |  |  |
| Missing | 0 (0.0%) | 1338 (0.5%) | 1338 (0.3%) |
| Dependent | 92020 (47.5%) | 47971 (18.3%) | 139991 (30.7%) |
| Retired Service Member | 54857 (28.3%) | 35167 (13.4%) | 90024 (19.7%) |
| Other | 627 (0.3%) | 12067 (4.6%) | 12694 (2.8%) |
| Active Duty | 32912 (17.0%) | 165490 (63.0%) | 198402 (43.5%) |
| Inactive Guard/Reserve | 13221 (6.8%) | 571 (0.2%) | 13792 (3.0%) |
|  |  |  |  |
| **Pay Plan** |  |  |  |
| Missing | 8288 (4.3%) | 1349 (0.5%) | 9637 (2.1%) |
| Other/Unknown | 317 (0.2%) | 648 (0.2%) | 965 (0.2%) |
| Cadet | 88 (0.0%) | 1359 (0.5%) | 1447 (0.3%) |
| Enlisted | 145027 (74.9%) | 200684 (76.4%) | 345711 (75.8%) |
| Officer | 39917 (20.6%) | 58564 (22.3%) | 98481 (21.6%) |
|  |  |  |  |
| **Service** |  |  |  |
| Missing | 8284 (4.3%) | 1344 (0.5%) | 9628 (2.1%) |
| Other/Unknown | 1123 (0.6%) | 712 (0.3%) | 1835 (0.4%) |
| Army | 76189 (39.3%) | 112218 (42.7%) | 188407 (41.3%) |
| Coast Guard | 7360 (3.8%) | 2751 (1.0%) | 10111 (2.2%) |
| Air Force | 51317 (26.5%) | 69027 (26.3%) | 120344 (26.4%) |
| Marines | 13866 (7.2%) | 26822 (10.2%) | 40688 (8.9%) |
| Navy | 35498 (18.3%) | 49730 (18.9%) | 85228 (18.7%) |

# **Supplemental Table 4. Healthcare Resource Utilization by Diagnostic Groups**

|  | Rotator Cuff (N=84698) | AC Joint (N=4013) | Instability/  Dislocation (N=7087) | Hypomobility/ Adhesive Capsulitis (N=11184) | Osteoarthrosis (N=13933) | Non-Specific Diagnosis (N=305764) | More than 1 Specific Disease (N=29562) | Total (N=456241) |
| --- | --- | --- | --- | --- | --- | --- | --- | --- |
| **Shoulder care encounters within 3 months** | | | | | | | | |
| Mean (SD) | 4.65 (4.68) | 4.05 (4.04) | 5.27 (4.80) | 6.60 (5.97) | 4.08 (3.62) | 2.82 (3.39) | 8.38 (5.91) | 3.70 (4.26) |
| Median | 3 | 3 | 4 | 5 | 3 | 1 | 7 | 2 |
| Q1, Q3 | 1, 6 | 1, 5 | 2, 7 | 2, 10 | 2, 5 | 1, 3 | 4, 11 | 1, 4 |
| Range | (1-67) | (1-34) | (1-50) | (1-54) | (1-35) | (1-58) | (1-68) | (1-68) |
|  |  |  |  |  |  |  |  |  |
| **NSAIDS** | | | | | | | | |
| None | 74762 (88.3%) | 3765 (93.8%) | 6643 (93.7%) | 9745 (87.1%) | 11996 (86.1%) | 276452 (90.4%) | 25438 (86.0%) | 408801 (89.6%) |
| At least 1 | 9936 (11.7%) | 248 (6.2%) | 444 (6.3%) | 1439 (12.9%) | 1937 (13.9%) | 29312 (9.6%) | 4124 (14.0%) | 47440 (10.4%) |
|  |  |  |  |  |  |  |  |  |
| **NSAIDS (among those with at least 1)** | | | | | | | | |
| Mean (SD) | 5.22 (3.22) | 5.00 (3.05) | 5.12 (3.03) | 5.19 (3.19) | 4.98 (3.20) | 5.24 (3.16) | 5.13 (3.17) | 5.21 (3.18) |
| Median | 5 | 4 | 5 | 5 | 4 | 5 | 5 | 5 |
| Q1, Q3 | 3, 7 | 3, 7 | 3, 7 | 3, 7 | 3, 7 | 3, 7 | 3, 7 | 3, 7 |
| Range | (1-26) | (1-16) | (1-19) | (1-20) | (1-22) | (1-25) | (1-25) | (1-26) |
|  |  |  |  |  |  |  |  |  |
| **Analgesics** | | | | | | | | |
| None | 79618 (94.0%) | 3892 (97.0%) | 6853 (96.7%) | 10459 (93.5%) | 12992 (93.2%) | 290833 (95.1%) | 27524 (93.1%) | 432171 (94.7%) |
| At least 1 | 5080 (6.0%) | 121 (3.0%) | 234 (3.3%) | 725 (6.5%) | 941 (6.8%) | 14931 (4.9%) | 2038 (6.9%) | 24070 (5.3%) |
|  |  |  |  |  |  |  |  |  |
| **Analgesics (among those with at least 1)** | | | | | | | | |
| Mean (SD) | 1.86 (1.31) | 1.99 (1.43) | 1.77 (1.16) | 1.89 (1.26) | 1.86 (1.30) | 1.89 (1.38) | 1.86 (1.33) | 1.88 (1.35) |
| Median | 1 | 2 | 1 | 1 | 1 | 1 | 1 | 1 |
| Q1, Q3 | 1, 2 | 1, 2 | 1, 2 | 1, 2 | 1, 2 | 1, 2 | 1, 2 | 1, 2 |
| Range | (1-16) | (1-10) | (1-7) | (1-8) | (1-10) | (1-20) | (1-11) | (1-20) |
|  |  |  |  |  |  |  |  |  |
| **Muscle relaxers** | | | | | | | | |
| None | 77418 (91.4%) | 3844 (95.8%) | 6759 (95.4%) | 10148 (90.7%) | 12533 (90.0%) | 284043 (92.9%) | 26570 (89.9%) | 421315 (92.3%) |
| At least 1 | 7280 (8.6%) | 169 (4.2%) | 328 (4.6%) | 1036 (9.3%) | 1400 (10.0%) | 21721 (7.1%) | 2992 (10.1%) | 34926 (7.7%) |
|  |  |  |  |  |  |  |  |  |
| **Muscle relaxers (among those with at least 1)** | | | | | | | | |
| Mean (SD) | 2.45 (1.78) | 2.62 (1.77) | 2.38 (1.65) | 2.44 (1.82) | 2.48 (1.95) | 2.45 (1.79) | 2.43 (1.73) | 2.45 (1.79) |
| Median | 2 | 2 | 2 | 2 | 2 | 2 | 2 | 2 |
| Q1, Q3 | 1, 3 | 1, 3 | 1, 3 | 1, 3 | 1, 3 | 1, 3 | 1, 3 | 1, 3 |
| Range | (1-16) | (1-12) | (1-10) | (1-18) | (1-19) | (1-19) | (1-17) | (1-19) |
|  |  |  |  |  |  |  |  |  |
| **Opioids** | | | | | | | | |
| None | 76716 (90.6%) | 3810 (94.9%) | 6732 (95.0%) | 10012 (89.5%) | 12371 (88.8%) | 282097 (92.3%) | 26236 (88.7%) | 417974 (91.6%) |
| At least 1 | 7982 (9.4%) | 203 (5.1%) | 355 (5.0%) | 1172 (10.5%) | 1562 (11.2%) | 23667 (7.7%) | 3326 (11.3%) | 38267 (8.4%) |
|  |  |  |  |  |  |  |  |  |
| **Opioids (among those with at least 1)** | | | | | | | | |
| Mean (SD) | 3.67 (3.08) | 3.72 (3.39) | 3.50 (2.99) | 3.63 (3.04) | 3.72 (3.18) | 3.68 (3.14) | 3.61 (3.05) | 3.67 (3.12) |
| Median | 3 | 3 | 2 | 3 | 3 | 3 | 3 | 3 |
| Q1, Q3 | 1, 5 | 1, 4 | 1, 5 | 1, 5 | 1, 5 | 1, 5 | 1, 5 | 1, 5 |
| Range | (1-33) | (1-18) | (1-20) | (1-22) | (1-24) | (1-50) | (1-27) | (1-50) |
|  |  |  |  |  |  |  |  |  |
| **Benzodiazepine** | | | | | | | | |
| None | 81291 (96.0%) | 3918 (97.6%) | 6944 (98.0%) | 10697 (95.6%) | 13282 (95.3%) | 295694 (96.7%) | 28153 (95.2%) | 439979 (96.4%) |
| At least 1 | 3407 (4.0%) | 95 (2.4%) | 143 (2.0%) | 487 (4.4%) | 651 (4.7%) | 10070 (3.3%) | 1409 (4.8%) | 16262 (3.6%) |
|  |  |  |  |  |  |  |  |  |
| **Benzodiazepine (among those with at least 1)** | | | | | | | | |
| Mean (SD) | 2.25 (1.84) | 2.24 (1.58) | 1.98 (1.50) | 2.27 (2.08) | 2.31 (1.81) | 2.22 (1.79) | 2.15 (1.65) | 2.22 (1.79) |
| Median | 2 | 2 | 1 | 1 | 2 | 2 | 1 | 2 |
| Q1, Q3 | 1, 3 | 1, 3 | 1, 2 | 1, 3 | 1, 3 | 1, 3 | 1, 3 | 1, 3 |
| Range | (1-18) | (1-8) | (1-9) | (1-25) | (1-13) | (1-21) | (1-13) | (1-25) |
|  |  |  |  |  |  |  |  |  |
| **Opioids and Benzodiazapines** | | | | | | | | |
| None | 81682 (96.4%) | 3928 (97.9%) | 6964 (98.3%) | 10748 (96.1%) | 13367 (95.9%) | 296869 (97.1%) | 28315 (95.8%) | 441873 (96.9%) |
| At least 1 | 3016 (3.6%) | 85 (2.1%) | 123 (1.7%) | 436 (3.9%) | 566 (4.1%) | 8895 (2.9%) | 1247 (4.2%) | 14368 (3.1%) |
|  |  |  |  |  |  |  |  |  |
| **Steroid joint injections** | | | | | | | | |
| None | 65893 (77.8%) | 3728 (92.9%) | 6876 (97.0%) | 9365 (83.7%) | 10991 (78.9%) | 294766 (96.4%) | 18276 (61.8%) | 409895 (89.8%) |
| At least 1 | 18805 (22.2%) | 285 (7.1%) | 211 (3.0%) | 1819 (16.3%) | 2942 (21.1%) | 10998 (3.6%) | 11286 (38.2%) | 46346 (10.2%) |
|  |  |  |  |  |  |  |  |  |
| **Steroid joint injections (among those with at least 1)** | | | | | | | | |
| Mean (SD) | 1.11 (0.47) | 1.06 (0.29) | 1.06 (0.23) | 1.12 (0.38) | 1.17 (0.46) | 1.08 (0.31) | 1.19 (0.47) | 1.12 (0.44) |
| Median | 1 | 1 | 1 | 1 | 1 | 1 | 1 | 1 |
| Q1, Q3 | 1, 1 | 1, 1 | 1, 1 | 1, 1 | 1, 1 | 1, 1 | 1, 1 | 1, 1 |
| Range | (1-46) | (1-4) | (1-2) | (1-4) | (1-6) | (1-8) | (1-11) | (1-46) |
|  |  |  |  |  |  |  |  |  |
| **Physical therapy** | | | | | | | | |
| None | 54982 (64.9%) | 2674 (66.6%) | 3922 (55.3%) | 4912 (43.9%) | 11078 (79.5%) | 221147 (72.3%) | 16082 (54.4%) | 314797 (69.0%) |
| At least 1 | 29716 (35.1%) | 1339 (33.4%) | 3165 (44.7%) | 6272 (56.1%) | 2855 (20.5%) | 84617 (27.7%) | 13480 (45.6%) | 141444 (31.0%) |
|  |  |  |  |  |  |  |  |  |
| **Physical therapy (among those with at least 1)** | | | | | | | | |
| Mean (SD) | 5.23 (4.69) | 4.38 (4.24) | 4.83 (4.40) | 6.39 (5.77) | 4.73 (4.37) | 4.34 (4.28) | 6.07 (5.21) | 4.80 (4.59) |
| Median | 4 | 3 | 3 | 5 | 3 | 3 | 5 | 3 |
| Q1, Q3 | 1, 8 | 1, 6 | 1, 7 | 2, 10 | 1, 7 | 1, 6 | 2, 9 | 1, 7 |
| Range | (1-38) | (1-28) | (1-35) | (1-54) | (1-32) | (1-41) | (1-63) | (1-63) |
|  |  |  |  |  |  |  |  |  |
| **Passive treatments** | | | | | | | | |
| None | 69771 (82.4%) | 3435 (85.6%) | 5785 (81.6%) | 7683 (68.7%) | 12630 (90.6%) | 272457 (89.1%) | 21784 (73.7%) | 393545 (86.3%) |
| At least 1 | 14927 (17.6%) | 578 (14.4%) | 1302 (18.4%) | 3501 (31.3%) | 1303 (9.4%) | 33307 (10.9%) | 7778 (26.3%) | 62696 (13.7%) |
|  |  |  |  |  |  |  |  |  |
| **Passive treatments (among those with at least 1)** | | | | | | | | |
| Mean (SD) | 4.94 (4.45) | 4.33 (4.02) | 4.15 (3.78) | 5.57 (4.92) | 4.61 (4.12) | 4.20 (3.96) | 5.53 (4.87) | 4.63 (4.29) |
| Median | 4 | 3 | 3 | 4 | 3 | 3 | 4 | 3 |
| Q1, Q3 | 2, 7 | 1, 6 | 1, 5 | 2, 8 | 2, 6 | 1, 6 | 2, 8 | 1, 6 |
| Range | (1-54) | (1-26) | (1-32) | (1-38) | (1-28) | (1-37) | (1-59) | (1-59) |
|  |  |  |  |  |  |  |  |  |
| **Active or exercise rehabilitation** | | | | | | | | |
| None | 52752 (62.3%) | 2714 (67.6%) | 3901 (55.0%) | 3654 (32.7%) | 10928 (78.4%) | 221349 (72.4%) | 14199 (48.0%) | 309497 (67.8%) |
| At least 1 | 31946 (37.7%) | 1299 (32.4%) | 3186 (45.0%) | 7530 (67.3%) | 3005 (21.6%) | 84415 (27.6%) | 15363 (52.0%) | 146744 (32.2%) |
|  |  |  |  |  |  |  |  |  |
| **Active or exercise rehabilitation (among those with at least 1)** | | | | | | | | |
| Mean (SD) | 5.34 (4.73) | 4.60 (4.27) | 4.98 (4.31) | 6.46 (5.60) | 4.82 (4.32) | 4.46 (4.28) | 6.20 (5.11) | 4.95 (4.60) |
| Median | 4 | 3 | 4 | 5 | 3 | 3 | 5 | 3 |
| Q1, Q3 | 2, 8 | 1, 6 | 2, 7 | 2, 10 | 1, 7 | 1, 6 | 2, 9 | 1, 7 |
| Range | (1-50) | (1-28) | (1-39) | (1-53) | (1-30) | (1-40) | (1-60) | (1-60) |
|  |  |  |  |  |  |  |  |  |
| **Manual therapy** | | | | | | | | |
| None | 64900 (76.6%) | 3389 (84.5%) | 5834 (82.3%) | 5394 (48.2%) | 12111 (86.9%) | 255981 (83.7%) | 18839 (63.7%) | 366448 (80.3%) |
| At least 1 | 19798 (23.4%) | 624 (15.5%) | 1253 (17.7%) | 5790 (51.8%) | 1822 (13.1%) | 49783 (16.3%) | 10723 (36.3%) | 89793 (19.7%) |
|  |  |  |  |  |  |  |  |  |
| **Manual therapy (among those with at least 1)** | | | | | | | | |
| Mean (SD) | 4.88 (4.66) | 4.04 (3.95) | 3.69 (3.71) | 5.88 (5.24) | 4.40 (4.24) | 3.97 (4.16) | 5.72 (4.94) | 4.51 (4.50) |
| Median | 3 | 2 | 2 | 4 | 3 | 2 | 4 | 3 |
| Q1, Q3 | 1, 7 | 1, 6 | 1, 5 | 2, 9 | 1, 6 | 1, 5 | 2, 8 | 1, 6 |
| Range | (1-42) | (1-23) | (1-32) | (1-40) | (1-32) | (1-39) | (1-59) | (1-59) |
|  |  |  |  |  |  |  |  |  |
| **Acupuncture** | | | | | | | | |
| None | 84425 (99.7%) | 4004 (99.8%) | 7073 (99.8%) | 11134 (99.6%) | 13901 (99.8%) | 304205 (99.5%) | 29481 (99.7%) | 454223 (99.6%) |
| At least 1 | 273 (0.3%) | 9 (0.2%) | 14 (0.2%) | 50 (0.4%) | 32 (0.2%) | 1559 (0.5%) | 81 (0.3%) | 2018 (0.4%) |
|  |  |  |  |  |  |  |  |  |
| **Acupuncture (among those with at least 1)** | | | | | | | | |
| Mean (SD) | 1.67 (1.44) | 1.11 (0.33) | 1.21 (0.43) | 1.80 (1.47) | 1.63 (1.24) | 1.50 (1.12) | 1.89 (2.07) | 1.55 (1.23) |
| Median | 1 | 1 | 1 | 1 | 1 | 1 | 1 | 1 |
| Q1, Q3 | 1, 2 | 1, 1 | 1, 1 | 1, 2 | 1, 2 | 1, 2 | 1, 2 | 1, 2 |
| Range | (1-11) | (1-2) | (1-2) | (1-9) | (1-7) | (1-13) | (1-13) | (1-13) |
|  |  |  |  |  |  |  |  |  |
| **X-rays** | | | | | | | | |
| None | 64114 (75.7%) | 2862 (71.3%) | 5429 (76.6%) | 8947 (80.0%) | 7357 (52.8%) | 270546 (88.5%) | 13710 (46.4%) | 372965 (81.7%) |
| At least 1 | 20584 (24.3%) | 1151 (28.7%) | 1658 (23.4%) | 2237 (20.0%) | 6576 (47.2%) | 35218 (11.5%) | 15852 (53.6%) | 83276 (18.3%) |
|  |  |  |  |  |  |  |  |  |
| **X-rays (among those with at least 1)** | | | | | | | | |
| Mean (SD) | 1.26 (0.51) | 1.39 (0.64) | 1.44 (0.71) | 1.30 (0.52) | 1.43 (0.56) | 1.26 (0.47) | 1.40 (0.65) | 1.31 (0.54) |
| Median | 1 | 1 | 1 | 1 | 1 | 1 | 1 | 1 |
| Q1, Q3 | 1, 1 | 1, 2 | 1, 2 | 1, 2 | 1, 2 | 1, 1 | 1, 2 | 1, 2 |
| Range | (1-5) | (1-7) | (1-8) | (1-6) | (1-5) | (1-6) | (1-8) | (1-8) |
|  |  |  |  |  |  |  |  |  |
| **MRIs** | | | | | | | | |
| None | 70113 (82.8%) | 3792 (94.5%) | 6241 (88.1%) | 10364 (92.7%) | 10866 (78.0%) | 297001 (97.1%) | 13898 (47.0%) | 412275 (90.4%) |
| At least 1 | 14585 (17.2%) | 221 (5.5%) | 846 (11.9%) | 820 (7.3%) | 3067 (22.0%) | 8763 (2.9%) | 15664 (53.0%) | 43966 (9.6%) |
|  |  |  |  |  |  |  |  |  |
| **MRIs (among those with at least 1)** | | | | | | | | |
| Mean (SD) | 1.41 (0.53) | 1.37 (0.50) | 1.42 (0.55) | 1.39 (0.51) | 1.45 (0.54) | 1.35 (0.50) | 1.52 (0.57) | 1.44 (0.54) |
| Median | 1 | 1 | 1 | 1 | 1 | 1 | 1 | 1 |
| Q1, Q3 | 1, 2 | 1, 2 | 1, 2 | 1, 2 | 1, 2 | 1, 2 | 1, 2 | 1, 2 |
| Range | (1-4) | (1-3) | (1-4) | (1-4) | (1-4) | (1-4) | (1-6) | (1-6) |
|  |  |  |  |  |  |  |  |  |
| **Arthrograms** | | | | | | | | |
| None | 83774 (98.9%) | 3993 (99.5%) | 6928 (97.8%) | 11135 (99.6%) | 13753 (98.7%) | 305064 (99.8%) | 28616 (96.8%) | 453263 (99.3%) |
| At least 1 | 924 (1.1%) | 20 (0.5%) | 159 (2.2%) | 49 (0.4%) | 180 (1.3%) | 700 (0.2%) | 946 (3.2%) | 2978 (0.7%) |
|  |  |  |  |  |  |  |  |  |
| **Arthrograms (among those with at least 1)** | | | | | | | | |
| Mean (SD) | 1.22 (0.44) | 1.05 (0.22) | 1.19 (0.48) | 1.31 (0.47) | 1.34 (0.58) | 1.18 (0.39) | 1.26 (0.46) | 1.23 (0.45) |
| Median | 1 | 1 | 1 | 1 | 1 | 1 | 1 | 1 |
| Q1, Q3 | 1, 1 | 1, 1 | 1, 1 | 1, 2 | 1, 2 | 1, 1 | 1, 2 | 1, 1 |
| Range | (1-4) | (1-2) | (1-4) | (1-2) | (1-5) | (1-2) | (1-4) | (1-5) |
|  |  |  |  |  |  |  |  |  |
| **CT scans** | | | | | | | | |
| None | 84553 (99.8%) | 4004 (99.8%) | 7045 (99.4%) | 11176 (99.9%) | 13815 (99.2%) | 305533 (99.9%) | 29336 (99.2%) | 455462 (99.8%) |
| At least 1 | 145 (0.2%) | 9 (0.2%) | 42 (0.6%) | 8 (0.1%) | 118 (0.8%) | 231 (0.1%) | 226 (0.8%) | 779 (0.2%) |
|  |  |  |  |  |  |  |  |  |
| **CT scans (among those with at least 1)** | | | | | | | | |
| Mean (SD) | 1.41 (0.55) | 1.44 (0.53) | 1.31 (0.47) | 1.50 (0.53) | 1.33 (0.49) | 1.27 (0.44) | 1.48 (0.54) | 1.37 (0.51) |
| Median | 1 | 1 | 1 | 1.5 | 1 | 1 | 1 | 1 |
| Q1, Q3 | 1, 2 | 1, 2 | 1, 2 | 1, 2 | 1, 2 | 1, 2 | 1, 2 | 1, 2 |
| Range | (1-4) | (1-2) | (1-2) | (1-2) | (1-3) | (1-2) | (1-4) | (1-4) |
|  |  |  |  |  |  |  |  |  |
| **Advanced imaging (MRIs, arthrograms, CT scans)** | | | | | | | | |
| None | 69973 (82.6%) | 3783 (94.3%) | 6207 (87.6%) | 10351 (92.6%) | 10755 (77.2%) | 296738 (97.0%) | 13726 (46.4%) | 411533 (90.2%) |
| At least 1 | 14725 (17.4%) | 230 (5.7%) | 880 (12.4%) | 833 (7.4%) | 3178 (22.8%) | 9026 (3.0%) | 15836 (53.6%) | 44708 (9.8%) |
|  |  |  |  |  |  |  |  |  |
| **Advanced imaging (MRIs, arthrograms, CT scans) (among those with at least 1)** | | | | | | | | |
| Mean (SD) | 1.48 (0.66) | 1.47 (0.66) | 1.64 (0.84) | 1.46 (0.64) | 1.52 (0.69) | 1.43 (0.64) | 1.60 (0.70) | 1.52 (0.68) |
| Median | 1 | 1 | 1 | 1 | 1 | 1 | 2 | 1 |
| Q1, Q3 | 1, 2 | 1, 2 | 1, 2 | 1, 2 | 1, 2 | 1, 2 | 1, 2 | 1, 2 |
| Range | (1-8) | (1-5) | (1-7) | (1-6) | (1-7) | (1-6) | (1-8) | (1-8) |
|  |  |  |  |  |  |  |  |  |
| **Imaging services** | | | | | | | | |
| X-ray only | 13348 (15.8%) | 1031 (25.7%) | 1222 (17.2%) | 1826 (16.3%) | 5375 (38.6%) | 32683 (10.7%) | 5891 (19.9%) | 61376 (13.5%) |
| Advanced imaging only | 7489 (8.8%) | 110 (2.7%) | 444 (6.3%) | 422 (3.8%) | 1977 (14.2%) | 6491 (2.1%) | 5875 (19.9%) | 22808 (5.0%) |
| X-ray 1st | 5579 (6.6%) | 89 (2.2%) | 353 (5.0%) | 312 (2.8%) | 934 (6.7%) | 2076 (0.7%) | 7444 (25.2%) | 16787 (3.7%) |
| Advanced imaging 1st | 1552 (1.8%) | 25 (0.6%) | 64 (0.9%) | 94 (0.8%) | 252 (1.8%) | 383 (0.1%) | 2406 (8.1%) | 4776 (1.0%) |
| X-ray and Advanced   imaging  (on index) | 105 (0.1%) | 6 (0.1%) | 19 (0.3%) | 5 (0.0%) | 15 (0.1%) | 76 (0.0%) | 111 (0.4%) | 337 (0.1%) |
| No imaging service | 56625 (66.9%) | 2752 (68.6%) | 4985 (70.3%) | 8525 (76.2%) | 5380 (38.6%) | 264055 (86.4%) | 7835 (26.5%) | 350157 (76.7%) |
|  |  |  |  |  |  |  |  |  |
| **Order of imaging services (after excluding those without imaging services)** | | | | | | | | |
| Missing | 56625 (.%) | 2752 (.%) | 4985 (.%) | 8525 (.%) | 5380 (.%) | 264055 (.%) | 7835 (.%) | 350157 |
| X-ray only | 13348 (47.5%) | 1031 (81.8%) | 1222 (58.1%) | 1826 (68.7%) | 5375 (62.8%) | 32683 (78.4%) | 5891 (27.1%) | 61376 (57.9%) |
| Advanced imaging only | 7489 (26.7%) | 110 (8.7%) | 444 (21.1%) | 422 (15.9%) | 1977 (23.1%) | 6491 (15.6%) | 5875 (27.0%) | 22808 (21.5%) |
| X-ray 1st | 5579 (19.9%) | 89 (7.1%) | 353 (16.8%) | 312 (11.7%) | 934 (10.9%) | 2076 (5.0%) | 7444 (34.3%) | 16787 (15.8%) |
| Advanced imaging 1st | 1552 (5.5%) | 25 (2.0%) | 64 (3.0%) | 94 (3.5%) | 252 (2.9%) | 383 (0.9%) | 2406 (11.1%) | 4776 (4.5%) |
| X-ray and Advanced  imaging (on index) | 105 (0.4%) | 6 (0.5%) | 19 (0.9%) | 5 (0.2%) | 15 (0.2%) | 76 (0.2%) | 111 (0.5%) | 337 (0.3%) |

# **Supplemental Table 5. Healthcare Resource Utilization by Diagnostic Groups and Initial Shoulder Care Location**

(First half of the table)

|  | Rotator Cuff, Military Clinic (N=41406) | Rotator Cuff, Civilian Clinic (N=43292) | AC Joint, Military Clinic (N=2412) | AC Joint, Civilian Clinic (N=1601) | Instability/ Dislocation, Military Clinic (N=4593) | Instability/ Dislocation, Civilian Clinic (N=2494) | Hypomobility/ Adhesive Capsulitis,  Military Clinic (N=4948) | Hypomobility/ Adhesive Capsulitis,  Civilian Clinic (N=6236) |
| --- | --- | --- | --- | --- | --- | --- | --- | --- |
| **Shoulder care encounters within 3 months** | | | | | | | | |
| N | 41406 | 43292 | 2412 | 1601 | 4593 | 2494 | 4948 | 6236 |
| Mean (SD) | 4.69 (4.54) | 4.62 (4.81) | 3.97 (3.95) | 4.18 (4.18) | 5.36 (4.73) | 59 (4.93) | 6.84 (5.89) | 6.41 (63) |
| Median | 3 | 3 | 2 | 3 | 4 | 3 | 5 | 4 |
| Q1, Q3 | 1, 6 | 1, 6 | 1, 5 | 2, 5 | 2, 8 | 2, 7 | 2, 10 | 2, 9 |
| Range | (1-42) | (1-67) | (1-32) | (1-34) | (1-50) | (1-44) | (1-43) | (1-54) |
|  |  |  |  |  |  |  |  |  |
| **NSAIDS** | | | | | | | | |
| None | 37084 (89.6%) | 37678 (87%) | 2295 (95.1%) | 1470 (91.8%) | 4357 (94.9%) | 2286 (91.7%) | 4305 (87%) | 5440 (87.2%) |
| At least 1 | 4322 (10.4%) | 5614 (13%) | 117 (4.9%) | 131 (8.2%) | 236 (5.1%) | 208 (8.3%) | 643 (13%) | 796 (12.8%) |
|  |  |  |  |  |  |  |  |  |
| **NSAIDS (among those with at least 1)** | | | | | | | | |
| N | 4322 | 5614 | 117 | 131 | 236 | 208 | 643 | 796 |
| Mean (SD) | 5.18 (3.23) | 5.26 (3.21) | 5.17 (3.21) | 4.84 (2.89) | 56 (33) | 5.19 (35) | 5.34 (3.35) | 57 (36) |
| Median | 5 | 5 | 4 | 4 | 5 | 5 | 5 | 5 |
| Q1, Q3 | 3, 7 | 3, 7 | 3, 7 | 3, 6 | 3, 7 | 3, 7 | 3, 7 | 3, 7 |
| Range | (1-25) | (1-26) | (1-16) | (1-14) | (1-15) | (1-19) | (1-20) | (1-20) |
|  |  |  |  |  |  |  |  |  |
| **Analgesics** | | | | | | | | |
| None | 39209 (94.7%) | 40409 (93.3%) | 2349 (97.4%) | 1543 (96.4%) | 4475 (97.4%) | 2378 (95.3%) | 4621 (93.4%) | 5838 (93.6%) |
| At least 1 | 2197 (5.3%) | 2883 (6.7%) | 63 (2.6%) | 58 (3.6%) | 118 (2.6%) | 116 (4.7%) | 327 (6.6%) | 398 (6.4%) |
|  |  |  |  |  |  |  |  |  |
| **Analgesics (among those with at least 1)** | | | | | | | | |
| N | 2197 | 2883 | 63 | 58 | 118 | 116 | 327 | 398 |
| Mean (SD) | 1.85 (1.29) | 1.86 (1.32) | 28 (1.70) | 1.90 (19) | 1.66 (11) | 1.88 (1.29) | 1.96 (1.23) | 1.83 (1.28) |
| Median | 1 | 1 | 1 | 2 | 1 | 1 | 2 | 1 |
| Q1, Q3 | 1, 2 | 1, 2 | 1, 3 | 1, 2 | 1, 2 | 1, 2 | 1, 3 | 1, 2 |
| Range | (1-12) | (1-16) | (1-10) | (1-6) | (1-6) | (1-7) | (1-7) | (1-8) |
|  |  |  |  |  |  |  |  |  |
| **Muscle relaxers** | | | | | | | | |
| None | 38248 (92.4%) | 39170 (90.5%) | 2332 (96.7%) | 1512 (94.4%) | 4418 (96.2%) | 2341 (93.9%) | 4471 (90.4%) | 5677 (91%) |
| At least 1 | 3158 (7.6%) | 4122 (9.5%) | 80 (3.3%) | 89 (5.6%) | 175 (3.8%) | 153 (6.1%) | 477 (9.6%) | 559 (9%) |
|  |  |  |  |  |  |  |  |  |
| **Muscle relaxers (among those with at least 1)** | | | | | | | | |
| N | 3158 | 4122 | 80 | 89 | 175 | 153 | 477 | 559 |
| Mean (SD) | 2.42 (1.80) | 2.47 (1.76) | 2.54 (1.66) | 2.69 (1.87) | 2.35 (1.69) | 2.41 (1.62) | 2.38 (1.71) | 2.49 (1.91) |
| Median | 2 | 2 | 2 | 2 | 2 | 2 | 2 | 2 |
| Q1, Q3 | 1, 3 | 1, 3 | 1, 3 | 1, 3 | 1, 3 | 1, 3 | 1, 3 | 1, 3 |
| Range | (1-16) | (1-15) | (1-9) | (1-12) | (1-10) | (1-8) | (1-11) | (1-18) |
|  |  |  |  |  |  |  |  |  |
| **Opioids** | | | | | | | | |
| None | 37916 (91.6%) | 38800 (89.6%) | 2306 (95.6%) | 1504 (93.9%) | 4396 (95.7%) | 2336 (93.7%) | 4414 (89.2%) | 5598 (89.8%) |
| At least 1 | 3490 (8.4%) | 4492 (10.4%) | 106 (4.4%) | 97 (6.1%) | 197 (4.3%) | 158 (6.3%) | 534 (10.8%) | 638 (10.2%) |
|  |  |  |  |  |  |  |  |  |
| **Opioids (among those with at least 1)** | | | | | | | | |
| N | 3490 | 4492 | 106 | 97 | 197 | 158 | 534 | 638 |
| Mean (SD) | 3.63 (36) | 3.70 (3.10) | 3.72 (3.49) | 3.73 (3.30) | 3.59 (3.23) | 3.39 (2.67) | 3.52 (2.97) | 3.72 (39) |
| Median | 3 | 3 | 3 | 3 | 3 | 2 | 3 | 3 |
| Q1, Q3 | 1, 5 | 1, 5 | 2, 4 | 1, 4 | 1, 5 | 1, 5 | 1, 5 | 1, 5 |
| Range | (1-33) | (1-32) | (1-18) | (1-18) | (1-20) | (1-14) | (1-18) | (1-22) |
|  |  |  |  |  |  |  |  |  |
| **Benzodiazepine** | | | | | | | | |
| None | 39927 (96.4%) | 41364 (95.5%) | 2363 (98%) | 1555 (97.1%) | 4507 (98.1%) | 2437 (97.7%) | 4740 (95.8%) | 5957 (95.5%) |
| At least 1 | 1479 (3.6%) | 1928 (4.5%) | 49 (2%) | 46 (2.9%) | 86 (1.9%) | 57 (2.3%) | 208 (4.2%) | 279 (4.5%) |
|  |  |  |  |  |  |  |  |  |
| **Benzodiazepine (among those with at least 1)** | | | | | | | | |
| N | 1479 | 1928 | 49 | 46 | 86 | 57 | 208 | 279 |
| Mean (SD) | 2.24 (1.81) | 2.25 (1.86) | 2.29 (1.74) | 2.20 (1.41) | 22 (1.64) | 1.91 (1.29) | 2.35 (2.36) | 2.21 (1.84) |
| Median | 2 | 2 | 2 | 2 | 1 | 1 | 1.5 | 1 |
| Q1, Q3 | 1, 3 | 1, 3 | 1, 3 | 1, 3 | 1, 2 | 1, 2 | 1, 3 | 1, 3 |
| Range | (1-18) | (1-18) | (1-8) | (1-7) | (1-9) | (1-7) | (1-25) | (1-17) |
|  |  |  |  |  |  |  |  |  |
| **Opioids and Benzodiazapines** | | | | | | | | |
| None | 40093 (96.8%) | 41589 (96.1%) | 2366 (98.1%) | 1562 (97.6%) | 4514 (98.3%) | 2450 (98.2%) | 4761 (96.2%) | 5987 (96%) |
| At least 1 | 1313 (3.2%) | 1703 (3.9%) | 46 (1.9%) | 39 (2.4%) | 79 (1.7%) | 44 (1.8%) | 187 (3.8%) | 249 (4%) |
|  |  |  |  |  |  |  |  |  |
| **Steroid joint injections** | | | | | | | | |
| None | 34786 (84%) | 31107 (71.9%) | 2256 (93.5%) | 1472 (91.9%) | 4452 (96.9%) | 2424 (97.2%) | 4289 (86.7%) | 5076 (81.4%) |
| At least 1 | 6620 (16%) | 12185 (28.1%) | 156 (6.5%) | 129 (8.1%) | 141 (3.1%) | 70 (2.8%) | 659 (13.3%) | 1160 (18.6%) |
|  |  |  |  |  |  |  |  |  |
| **Steroid joint injections (among those with at least 1)** | | | | | | | | |
| N | 6620 | 12185 | 156 | 129 | 141 | 70 | 659 | 1160 |
| Mean (SD) | 16 (0.25) | 1.14 (0.56) | 11 (08) | 1.12 (0.41) | 14 (0.20) | 19 (0.28) | 16 (0.25) | 1.16 (0.43) |
| Median | 1 | 1 | 1 | 1 | 1 | 1 | 1 | 1 |
| Q1, Q3 | 1, 1 | 1, 1 | 1, 1 | 1, 1 | 1, 1 | 1, 1 | 1, 1 | 1, 1 |
| Range | (1-3) | (1-46) | (1-2) | (1-4) | (1-2) | (1-2) | (1-3) | (1-4) |
|  |  |  |  |  |  |  |  |  |
| **Physical therapy** | | | | | | | | |
| None | 22088 (53.3%) | 32894 (76%) | 1378 (57.1%) | 1296 (80.9%) | 2048 (44.6%) | 1874 (75.1%) | 1791 (36.2%) | 3121 (50%) |
| At least 1 | 19318 (46.7%) | 10398 (24%) | 1034 (42.9%) | 305 (19.1%) | 2545 (55.4%) | 620 (24.9%) | 3157 (63.8%) | 3115 (50%) |
|  |  |  |  |  |  |  |  |  |
| **Physical therapy (among those with at least 1)** | | | | | | | | |
| N | 19318 | 10398 | 1034 | 305 | 2545 | 620 | 3157 | 3115 |
| Mean (SD) | 4.65 (4.20) | 6.31 (5.32) | 3.95 (3.94) | 5.82 (4.87) | 4.52 (49) | 68 (5.30) | 61 (5.43) | 6.77 (67) |
| Median | 3 | 5 | 2 | 4 | 3 | 5 | 4 | 5 |
| Q1, Q3 | 1, 7 | 2, 9 | 1, 6 | 1, 9 | 1, 6 | 2, 9 | 2, 9 | 2, 10 |
| Range | (1-33) | (1-38) | (1-28) | (1-28) | (1-35) | (1-32) | (1-41) | (1-54) |
|  |  |  |  |  |  |  |  |  |
| **Passive treatments** | | | | | | | | |
| None | 32878 (79.4%) | 36893 (85.2%) | 1994 (82.7%) | 1441 (90%) | 3569 (77.7%) | 2216 (88.9%) | 3142 (63.5%) | 4541 (72.8%) |
| At least 1 | 8528 (20.6%) | 6399 (14.8%) | 418 (17.3%) | 160 (10%) | 1024 (22.3%) | 278 (11.1%) | 1806 (36.5%) | 1695 (27.2%) |
|  |  |  |  |  |  |  |  |  |
| **Passive treatments (among those with at least 1)** | | | | | | | | |
| N | 8528 | 6399 | 418 | 160 | 1024 | 278 | 1806 | 1695 |
| Mean (SD) | 4.39 (3.77) | 5.67 (5.13) | 3.89 (3.68) | 5.49 (4.61) | 3.84 (3.30) | 5.30 (54) | 5.35 (4.44) | 5.79 (5.38) |
| Median | 3 | 4 | 2 | 4 | 3 | 4 | 4 | 4 |
| Q1, Q3 | 2, 6 | 2, 8 | 1, 5 | 2, 8 | 1, 5 | 2, 7 | 2, 8 | 2, 9 |
| Range | (1-32) | (1-54) | (1-24) | (1-26) | (1-23) | (1-32) | (1-30) | (1-38) |
|  |  |  |  |  |  |  |  |  |
| **Active or exercise rehabilitation** | | | | | | | | |
| None | 21907 (52.9%) | 30845 (71.2%) | 1456 (60.4%) | 1258 (78.6%) | 2112 (46%) | 1789 (71.7%) | 1423 (28.8%) | 2231 (35.8%) |
| At least 1 | 19499 (47.1%) | 12447 (28.8%) | 956 (39.6%) | 343 (21.4%) | 2481 (54%) | 705 (28.3%) | 3525 (71.2%) | 4005 (64.2%) |
|  |  |  |  |  |  |  |  |  |
| **Active or exercise rehabilitation (among those with at least 1)** | | | | | | | | |
| N | 19499 | 12447 | 956 | 343 | 2481 | 705 | 3525 | 4005 |
| Mean (SD) | 4.66 (4.14) | 6.40 (5.36) | 49 (3.85) | 62 (51) | 4.69 (3.98) | 61 (5.16) | 6.19 (5.22) | 6.69 (5.91) |
| Median | 3 | 5 | 3 | 5 | 4 | 4 | 5 | 5 |
| Q1, Q3 | 1, 7 | 2, 9 | 1, 6 | 2, 9 | 2, 6 | 2, 8 | 2, 9 | 2, 10 |
| Range | (1-38) | (1-50) | (1-27) | (1-28) | (1-39) | (1-32) | (1-41) | (1-53) |
|  |  |  |  |  |  |  |  |  |
| **Manual therapy** | | | | | | | | |
| None | 30977 (74.8%) | 33923 (78.4%) | 2000 (82.9%) | 1389 (86.8%) | 3742 (81.5%) | 2092 (83.9%) | 2406 (48.6%) | 2988 (47.9%) |
| At least 1 | 10429 (25.2%) | 9369 (21.6%) | 412 (17.1%) | 212 (13.2%) | 851 (18.5%) | 402 (16.1%) | 2542 (51.4%) | 3248 (52.1%) |
|  |  |  |  |  |  |  |  |  |
| **Manual therapy (among those with at least 1)** | | | | | | | | |
| N | 10429 | 9369 | 412 | 212 | 851 | 402 | 2542 | 3248 |
| Mean (SD) | 3.98 (3.95) | 5.89 (5.16) | 3.16 (3.17) | 5.74 (4.69) | 38 (35) | 4.98 (4.56) | 5.54 (4.90) | 6.14 (5.48) |
| Median | 2 | 4 | 2 | 5 | 2 | 3 | 4 | 4 |
| Q1, Q3 | 1, 5 | 2, 8 | 1, 4 | 2, 8 | 1, 4 | 2, 7 | 2, 8 | 2, 9 |
| Range | (1-34) | (1-42) | (1-20) | (1-23) | (1-23) | (1-32) | (1-40) | (1-36) |
|  |  |  |  |  |  |  |  |  |
| **Acupuncture** | | | | | | | | |
| None | 41145 (99.4%) | 43280 (100%) | 2403 (99.6%) | 1601 (100%) | 4579 (99.7%) | 2494 (100%) | 4898 (99%) | 6236 (100%) |
| At least 1 | 261 (0.6%) | 12 (0%) | 9 (0.4%) | 0 (0%) | 14 (0.3%) | 0 (0%) | 50 (1%) | 0 (0%) |
|  |  |  |  |  |  |  |  |  |
| **Acupuncture (among those with at least 1)** | | | | | | | | |
| N | 261 | 12 | 9 | 0 | 14 | 0 | 50 | 0 |
| Mean (SD) | 1.69 (1.47) | 1.33 (0.65) | 1.11 (0.33) |  | 1.21 (0.43) |  | 1.80 (1.47) |  |
| Median | 1 | 1 | 1 | . | 1 | . | 1 | . |
| Q1, Q3 | 1, 2 | 1, 1.5 | 1, 1 |  | 1, 1 |  | 1, 2 |  |
| Range | (1-11) | (1-3) | (1-2) |  | (1-2) |  | (1-9) |  |
|  |  |  |  |  |  |  |  |  |
| **X-rays** | | | | | | | | |
| None | 39671 (95.8%) | 24443 (56.5%) | 2336 (96.8%) | 526 (32.9%) | 4389 (95.6%) | 1040 (41.7%) | 4768 (96.4%) | 4179 (67%) |
| At least 1 | 1735 (4.2%) | 18849 (43.5%) | 76 (3.2%) | 1075 (67.1%) | 204 (4.4%) | 1454 (58.3%) | 180 (3.6%) | 2057 (33%) |
|  |  |  |  |  |  |  |  |  |
| **X-rays (among those with at least 1)** | | | | | | | | |
| N | 1735 | 18849 | 76 | 1075 | 204 | 1454 | 180 | 2057 |
| Mean (SD) | 1.12 (0.36) | 1.28 (0.52) | 1.24 (0.51) | 1.40 (0.65) | 1.16 (0.39) | 1.48 (0.73) | 1.10 (0.30) | 1.31 (0.54) |
| Median | 1 | 1 | 1 | 1 | 1 | 1 | 1 | 1 |
| Q1, Q3 | 1, 1 | 1, 1 | 1, 1 | 1, 2 | 1, 1 | 1, 2 | 1, 1 | 1, 2 |
| Range | (1-4) | (1-5) | (1-3) | (1-7) | (1-3) | (1-8) | (1-2) | (1-6) |
|  |  |  |  |  |  |  |  |  |
| **MRIs** | | | | | | | | |
| None | 38017 (91.8%) | 32096 (74.1%) | 2346 (97.3%) | 1446 (90.3%) | 4259 (92.7%) | 1982 (79.5%) | 4753 (96.1%) | 5611 (90%) |
| At least 1 | 3389 (8.2%) | 11196 (25.9%) | 66 (2.7%) | 155 (9.7%) | 334 (7.3%) | 512 (20.5%) | 195 (3.9%) | 625 (10%) |
|  |  |  |  |  |  |  |  |  |
| **MRIs (among those with at least 1)** | | | | | | | | |
| N | 3389 | 11196 | 66 | 155 | 334 | 512 | 195 | 625 |
| Mean (SD) | 1.41 (0.54) | 1.41 (0.53) | 1.39 (0.49) | 1.36 (0.51) | 1.44 (0.55) | 1.40 (0.54) | 1.42 (0.50) | 1.38 (0.51) |
| Median | 1 | 1 | 1 | 1 | 1 | 1 | 1 | 1 |
| Q1, Q3 | 1, 2 | 1, 2 | 1, 2 | 1, 2 | 1, 2 | 1, 2 | 1, 2 | 1, 2 |
| Range | (1-4) | (1-4) | (1-2) | (1-3) | (1-4) | (1-4) | (1-3) | (1-4) |
|  |  |  |  |  |  |  |  |  |
| **Arthrograms** | | | | | | | | |
| None | 41128 (99.3%) | 42646 (98.5%) | 2403 (99.6%) | 1590 (99.3%) | 4522 (98.5%) | 2406 (96.5%) | 4927 (99.6%) | 6208 (99.6%) |
| At least 1 | 278 (0.7%) | 646 (1.5%) | 9 (0.4%) | 11 (0.7%) | 71 (1.5%) | 88 (3.5%) | 21 (0.4%) | 28 (0.4%) |
|  |  |  |  |  |  |  |  |  |
| **Arthrograms (among those with at least 1)** | | | | | | | | |
| N | 278 | 646 | 9 | 11 | 71 | 88 | 21 | 28 |
| Mean (SD) | 1.21 (0.46) | 1.22 (0.42) | 1.11 (0.33) | 10 (00) | 1.20 (0.47) | 1.19 (0.50) | 1.14 (0.36) | 1.43 (0.50) |
| Median | 1 | 1 | 1 | 1 | 1 | 1 | 1 | 1 |
| Q1, Q3 | 1, 1 | 1, 1 | 1, 1 | 1, 1 | 1, 1 | 1, 1 | 1, 1 | 1, 2 |
| Range | (1-4) | (1-4) | (1-2) | (1-1) | (1-3) | (1-4) | (1-2) | (1-2) |
|  |  |  |  |  |  |  |  |  |
| **CT scans** | | | | | | | | |
| None | 41383 (99.9%) | 43170 (99.7%) | 2411 (100%) | 1593 (99.5%) | 4583 (99.8%) | 2462 (98.7%) | 4946 (100%) | 6230 (99.9%) |
| At least 1 | 23 (0.1%) | 122 (0.3%) | 1 (0%) | 8 (0.5%) | 10 (0.2%) | 32 (1.3%) | 2 (0%) | 6 (0.1%) |
|  |  |  |  |  |  |  |  |  |
| **CT scans (among those with at least 1)** | | | | | | | | |
| N | 23 | 122 | 1 | 8 | 10 | 32 | 2 | 6 |
| Mean (SD) | 1.30 (0.47) | 1.43 (0.56) | 10 (.) | 1.50 (0.53) | 1.30 (0.48) | 1.31 (0.47) | 1.50 (0.71) | 1.50 (0.55) |
| Median | 1 | 1 | 1 | 1.5 | 1 | 1 | 1.5 | 1.5 |
| Q1, Q3 | 1, 2 | 1, 2 | 1, 1 | 1, 2 | 1, 2 | 1, 2 | 1, 2 | 1, 2 |
| Range | (1-2) | (1-4) | (1-1) | (1-2) | (1-2) | (1-2) | (1-2) | (1-2) |
|  |  |  |  |  |  |  |  |  |
| **Advanced imaging (MRIs, arthrograms, CT scans)** | | | | | | | | |
| None | 37988 (91.7%) | 31985 (73.9%) | 2344 (97.2%) | 1439 (89.9%) | 4247 (92.5%) | 1960 (78.6%) | 4749 (96%) | 5602 (89.8%) |
| At least 1 | 3418 (8.3%) | 11307 (26.1%) | 68 (2.8%) | 162 (10.1%) | 346 (7.5%) | 534 (21.4%) | 199 (4%) | 634 (10.2%) |
|  |  |  |  |  |  |  |  |  |
| **Advanced imaging (MRIs, arthrograms, CT scans) (among those with at least 1)** | | | | | | | | |
| N | 3418 | 11307 | 68 | 162 | 346 | 534 | 199 | 634 |
| Mean (SD) | 1.51 (0.70) | 1.48 (0.65) | 1.51 (0.72) | 1.44 (0.63) | 1.67 (0.88) | 1.62 (0.82) | 1.52 (0.68) | 1.44 (0.62) |
| Median | 1 | 1 | 1 | 1 | 1 | 1 | 1 | 1 |
| Q1, Q3 | 1, 2 | 1, 2 | 1, 2 | 1, 2 | 1, 2 | 1, 2 | 1, 2 | 1, 2 |
| Range | (1-8) | (1-8) | (1-4) | (1-5) | (1-7) | (1-6) | (1-4) | (1-6) |
|  |  |  |  |  |  |  |  |  |
| **Imaging services** | | | | | | | | |
| X-ray only | 973 (2.3%) | 12375 (28.6%) | 63 (2.6%) | 968 (60.5%) | 118 (2.6%) | 1104 (44.3%) | 145 (2.9%) | 1681 (27%) |
| Advanced imaging only | 2656 (6.4%) | 4833 (11.2%) | 55 (2.3%) | 55 (3.4%) | 260 (5.7%) | 184 (7.4%) | 164 (3.3%) | 258 (4.1%) |
| X-ray 1st | 298 (0.7%) | 5281 (12.2%) | 4 (0.2%) | 85 (5.3%) | 44 (1%) | 309 (12.4%) | 11 (0.2%) | 301 (4.8%) |
| Advanced imaging 1st | 425 (1%) | 1127 (2.6%) | 7 (0.3%) | 18 (1.1%) | 27 (0.6%) | 37 (1.5%) | 21 (0.4%) | 73 (1.2%) |
| X-ray and Advanced imaging (on index) | 39 (0.1%) | 66 (0.2%) | 2 (0.1%) | 4 (0.2%) | 15 (0.3%) | 4 (0.2%) | 3 (0.1%) | 2 (0%) |
| No imaging service | 37015 (89.4%) | 19610 (45.3%) | 2281 (94.6%) | 471 (29.4%) | 4129 (89.9%) | 856 (34.3%) | 4604 (93%) | 3921 (62.9%) |
| **Order of imaging services (after excluding those without imaging services)** | | | | | | | | |
| Missing | 37015 (.%) | 19610 (.%) | 2281 (.%) | 471 (.%) | 4129 (.%) | 856 (.%) | 4604 (.%) | 3921 (.%) |
| X-ray only | 973 (22.2%) | 12375 (52.3%) | 63 (48.1%) | 968 (85.7%) | 118 (25.4%) | 1104 (67.4%) | 145 (42.2%) | 1681 (72.6%) |
| Advanced imaging only | 2656 (60.5%) | 4833 (20.4%) | 55 (42%) | 55 (4.9%) | 260 (56%) | 184 (11.2%) | 164 (47.7%) | 258 (11.1%) |
| X-ray 1st | 298 (6.8%) | 5281 (22.3%) | 4 (3.1%) | 85 (7.5%) | 44 (9.5%) | 309 (18.9%) | 11 (3.2%) | 301 (13%) |
| Advanced imaging 1st | 425 (9.7%) | 1127 (4.8%) | 7 (5.3%) | 18 (1.6%) | 27 (5.8%) | 37 (2.3%) | 21 (6.1%) | 73 (3.2%) |
| X-ray and Advanced imaging (on index) | 39 (0.9%) | 66 (0.3%) | 2 (1.5%) | 4 (0.4%) | 15 (3.2%) | 4 (0.2%) | 3 (0.9%) | 2 (0.1%) |

(Second half of the table)

|  | Osteoarthrosis, Military Clinic (N=5142) | Osteoarthrosis, Civilian Clinic (N=8791) | Non-Specific Diagnosis,  Military Clinic (N=194401) | Non-Specific Diagnosis,  Civilian Clinic (N=111363) | More than 1 Specific Disease, Military Clinic (N=9702) | More than 1 Specific Disease, Civilian Clinic (N=19860) |
| --- | --- | --- | --- | --- | --- | --- |
| **Shoulder care encounters within 3 months** | | | | | | |
| N | 5142 | 8791 | 194401 | 111363 | 9702 | 19860 |
| Mean (SD) | 4.57 (3.98) | 3.80 (3.36) | 2.80 (3.27) | 2.86 (3.59) | 8.33 (5.66) | 8.41 (63) |
| Median | 3 | 3 | 1 | 2 | 7 | 7 |
| Q1, Q3 | 2, 6 | 2, 4 | 1, 3 | 1, 3 | 4, 11 | 4, 11.5 |
| Range | (1-29) | (1-35) | (1-39) | (1-58) | (1-40) | (1-68) |
|  |  |  |  |  |  |  |
| **NSAIDS** | | | | | | |
| None | 4417 (85.9%) | 7579 (86.2%) | 177839 (91.5%) | 98613 (88.6%) | 8382 (86.4%) | 17056 (85.9%) |
| At least 1 | 725 (14.1%) | 1212 (13.8%) | 16562 (8.5%) | 12750 (11.4%) | 1320 (13.6%) | 2804 (14.1%) |
|  |  |  |  |  |  |  |
| **NSAIDS (among those with at least 1)** | | | | | | |
| N | 725 | 1212 | 16562 | 12750 | 1320 | 2804 |
| Mean (SD) | 50 (3.30) | 4.97 (3.14) | 5.21 (3.17) | 5.27 (3.16) | 59 (3.22) | 5.14 (3.14) |
| Median | 4 | 4 | 5 | 5 | 5 | 5 |
| Q1, Q3 | 3, 7 | 2.5, 7 | 3, 7 | 3, 7 | 3, 7 | 3, 7 |
| Range | (1-22) | (1-22) | (1-25) | (1-22) | (1-20) | (1-25) |
|  |  |  |  |  |  |  |
| **Analgesics** | | | | | | |
| None | 4778 (92.9%) | 8214 (93.4%) | 186061 (95.7%) | 104772 (94.1%) | 9041 (93.2%) | 18483 (93.1%) |
| At least 1 | 364 (7.1%) | 577 (6.6%) | 8340 (4.3%) | 6591 (5.9%) | 661 (6.8%) | 1377 (6.9%) |
|  |  |  |  |  |  |  |
| **Analgesics (among those with at least 1)** | | | | | | |
| N | 364 | 577 | 8340 | 6591 | 661 | 1377 |
| Mean (SD) | 1.86 (1.28) | 1.86 (1.32) | 1.89 (1.39) | 1.89 (1.36) | 1.89 (1.39) | 1.85 (1.30) |
| Median | 1 | 1 | 1 | 1 | 1 | 1 |
| Q1, Q3 | 1, 2 | 1, 2 | 1, 2 | 1, 2 | 1, 2 | 1, 2 |
| Range | (1-10) | (1-9) | (1-20) | (1-17) | (1-11) | (1-11) |
|  |  |  |  |  |  |  |
| **Muscle relaxers** | | | | | | |
| None | 4606 (89.6%) | 7927 (90.2%) | 182124 (93.7%) | 101919 (91.5%) | 8738 (90.1%) | 17832 (89.8%) |
| At least 1 | 536 (10.4%) | 864 (9.8%) | 12277 (6.3%) | 9444 (8.5%) | 964 (9.9%) | 2028 (10.2%) |
|  |  |  |  |  |  |  |
| **Muscle relaxers (among those with at least 1)** | | | | | | |
| N | 536 | 864 | 12277 | 9444 | 964 | 2028 |
| Mean (SD) | 2.42 (1.96) | 2.52 (1.94) | 2.44 (1.80) | 2.46 (1.78) | 2.51 (1.75) | 2.40 (1.73) |
| Median | 2 | 2 | 2 | 2 | 2 | 2 |
| Q1, Q3 | 1, 3 | 1, 3 | 1, 3 | 1, 3 | 1, 3 | 1, 3 |
| Range | (1-18) | (1-19) | (1-18) | (1-19) | (1-11) | (1-17) |
|  |  |  |  |  |  |  |
| **Opioids** | | | | | | |
| None | 4535 (88.2%) | 7836 (89.1%) | 181053 (93.1%) | 101044 (90.7%) | 8652 (89.2%) | 17584 (88.5%) |
| At least 1 | 607 (11.8%) | 955 (10.9%) | 13348 (6.9%) | 10319 (9.3%) | 1050 (10.8%) | 2276 (11.5%) |
|  |  |  |  |  |  |  |
| **Opioids (among those with at least 1)** | | | | | | |
| N | 607 | 955 | 13348 | 10319 | 1050 | 2276 |
| Mean (SD) | 3.50 (34) | 3.86 (3.26) | 3.68 (3.13) | 3.68 (3.16) | 3.67 (38) | 3.58 (33) |
| Median | 3 | 3 | 3 | 3 | 3 | 3 |
| Q1, Q3 | 1, 5 | 2, 5 | 1, 5 | 1, 5 | 2, 5 | 1, 5 |
| Range | (1-19) | (1-24) | (1-35) | (1-50) | (1-26) | (1-27) |
|  |  |  |  |  |  |  |
| **Benzodiazepine** | | | | | | |
| None | 4905 (95.4%) | 8377 (95.3%) | 188739 (97.1%) | 106955 (96%) | 9239 (95.2%) | 18914 (95.2%) |
| At least 1 | 237 (4.6%) | 414 (4.7%) | 5662 (2.9%) | 4408 (4%) | 463 (4.8%) | 946 (4.8%) |
|  |  |  |  |  |  |  |
| **Benzodiazepine (among those with at least 1)** | | | | | | |
| N | 237 | 414 | 5662 | 4408 | 463 | 946 |
| Mean (SD) | 2.27 (1.84) | 2.34 (1.79) | 2.22 (1.78) | 2.21 (1.79) | 2.13 (1.52) | 2.15 (1.71) |
| Median | 2 | 2 | 2 | 1.5 | 2 | 1 |
| Q1, Q3 | 1, 3 | 1, 3 | 1, 3 | 1, 3 | 1, 3 | 1, 3 |
| Range | (1-13) | (1-13) | (1-21) | (1-16) | (1-9) | (1-13) |
|  |  |  |  |  |  |  |
| **Opioids and Benzodiazapines** | | | | | | |
| None | 4933 (95.9%) | 8434 (95.9%) | 189406 (97.4%) | 107463 (96.5%) | 9293 (95.8%) | 19022 (95.8%) |
| At least 1 | 209 (4.1%) | 357 (4.1%) | 4995 (2.6%) | 3900 (3.5%) | 409 (4.2%) | 838 (4.2%) |
|  |  |  |  |  |  |  |
| **Steroid joint injections** | | | | | | |
| None | 3974 (77.3%) | 7017 (79.8%) | 189155 (97.3%) | 105611 (94.8%) | 6598 (68%) | 11678 (58.8%) |
| At least 1 | 1168 (22.7%) | 1774 (20.2%) | 5246 (2.7%) | 5752 (5.2%) | 3104 (32%) | 8182 (41.2%) |
|  |  |  |  |  |  |  |
| **Steroid joint injections (among those with at least 1)** | | | | | | |
| N | 1168 | 1774 | 5246 | 5752 | 3104 | 8182 |
| Mean (SD) | 19 (0.35) | 1.22 (0.52) | 14 (0.23) | 1.11 (0.36) | 1.13 (0.37) | 1.21 (0.50) |
| Median | 1 | 1 | 1 | 1 | 1 | 1 |
| Q1, Q3 | 1, 1 | 1, 1 | 1, 1 | 1, 1 | 1, 1 | 1, 1 |
| Range | (1-6) | (1-6) | (1-7) | (1-8) | (1-4) | (1-11) |
|  |  |  |  |  |  |  |
| **Physical therapy** | | | | | | |
| None | 3324 (64.6%) | 7754 (88.2%) | 127381 (65.5%) | 93766 (84.2%) | 4085 (42.1%) | 11997 (60.4%) |
| At least 1 | 1818 (35.4%) | 1037 (11.8%) | 67020 (34.5%) | 17597 (15.8%) | 5617 (57.9%) | 7863 (39.6%) |
|  |  |  |  |  |  |  |
| **Physical therapy (among those with at least 1)** | | | | | | |
| N | 1818 | 1037 | 67020 | 17597 | 5617 | 7863 |
| Mean (SD) | 4.34 (3.98) | 5.42 (4.90) | 3.79 (3.67) | 6.44 (5.58) | 5.63 (4.75) | 6.38 (5.49) |
| Median | 3 | 4 | 2 | 5 | 4 | 5 |
| Q1, Q3 | 1, 6 | 1, 8 | 1, 5 | 2, 10 | 2, 8 | 2, 10 |
| Range | (1-25) | (1-32) | (1-37) | (1-41) | (1-35) | (1-63) |
|  |  |  |  |  |  |  |
| **Passive treatments** | | | | | | |
| None | 4423 (86%) | 8207 (93.4%) | 170747 (87.8%) | 101710 (91.3%) | 6657 (68.6%) | 15127 (76.2%) |
| At least 1 | 719 (14%) | 584 (6.6%) | 23654 (12.2%) | 9653 (8.7%) | 3045 (31.4%) | 4733 (23.8%) |
|  |  |  |  |  |  |  |
| **Passive treatments (among those with at least 1)** | | | | | | |
| N | 719 | 584 | 23654 | 9653 | 3045 | 4733 |
| Mean (SD) | 4.27 (3.61) | 52 (4.65) | 3.69 (3.29) | 5.43 (54) | 5.20 (4.44) | 5.74 (5.12) |
| Median | 3 | 3 | 3 | 4 | 4 | 4 |
| Q1, Q3 | 2, 6 | 2, 7 | 1, 5 | 2, 8 | 2, 7 | 2, 8 |
| Range | (1-26) | (1-28) | (1-31) | (1-37) | (1-35) | (1-59) |
|  |  |  |  |  |  |  |
| **Active or exercise rehabilitation** | | | | | | |
| None | 3398 (66.1%) | 7530 (85.7%) | 130628 (67.2%) | 90721 (81.5%) | 3859 (39.8%) | 10340 (52.1%) |
| At least 1 | 1744 (33.9%) | 1261 (14.3%) | 63773 (32.8%) | 20642 (18.5%) | 5843 (60.2%) | 9520 (47.9%) |
|  |  |  |  |  |  |  |
| **Active or exercise rehabilitation (among those with at least 1)** | | | | | | |
| N | 1744 | 1261 | 63773 | 20642 | 5843 | 9520 |
| Mean (SD) | 4.41 (3.91) | 5.38 (4.79) | 3.84 (3.60) | 6.36 (5.48) | 5.78 (4.70) | 6.46 (5.34) |
| Median | 3 | 4 | 2 | 5 | 5 | 5 |
| Q1, Q3 | 1, 6 | 2, 8 | 1, 5 | 2, 9 | 2, 8 | 2, 9 |
| Range | (1-27) | (1-30) | (1-37) | (1-40) | (1-32) | (1-60) |
|  |  |  |  |  |  |  |
| **Manual therapy** | | | | | | |
| None | 4217 (82%) | 7894 (89.8%) | 161130 (82.9%) | 94851 (85.2%) | 6164 (63.5%) | 12675 (63.8%) |
| At least 1 | 925 (18%) | 897 (10.2%) | 33271 (17.1%) | 16512 (14.8%) | 3538 (36.5%) | 7185 (36.2%) |
|  |  |  |  |  |  |  |
| **Manual therapy (among those with at least 1)** | | | | | | |
| N | 925 | 897 | 33271 | 16512 | 3538 | 7185 |
| Mean (SD) | 3.69 (3.55) | 5.13 (4.74) | 38 (3.14) | 5.77 (5.23) | 57 (4.49) | 64 (5.12) |
| Median | 2 | 3 | 2 | 4 | 4 | 5 |
| Q1, Q3 | 1, 5 | 2, 7 | 1, 4 | 2, 8 | 2, 7 | 2, 9 |
| Range | (1-24) | (1-32) | (1-30) | (1-39) | (1-32) | (1-59) |
|  |  |  |  |  |  |  |
| **Acupuncture** | | | | | | |
| None | 5112 (99.4%) | 8789 (100%) | 192852 (99.2%) | 111353 (100%) | 9627 (99.2%) | 19854 (100%) |
| At least 1 | 30 (0.6%) | 2 (0%) | 1549 (0.8%) | 10 (0%) | 75 (0.8%) | 6 (0%) |
|  |  |  |  |  |  |  |
| **Acupuncture (among those with at least 1)** | | | | | | |
| N | 30 | 2 | 1549 | 10 | 75 | 6 |
| Mean (SD) | 1.60 (1.25) | 20 (1.41) | 1.51 (1.13) | 1.20 (0.42) | 1.93 (2.15) | 1.33 (0.52) |
| Median | 1 | 2 | 1 | 1 | 1 | 1 |
| Q1, Q3 | 1, 2 | 1, 3 | 1, 2 | 1, 1 | 1, 2 | 1, 2 |
| Range | (1-7) | (1-3) | (1-13) | (1-2) | (1-13) | (1-2) |
|  |  |  |  |  |  |  |
| **X-rays** | | | | | | |
| None | 4767 (92.7%) | 2590 (29.5%) | 193086 (99.3%) | 77460 (69.6%) | 8023 (82.7%) | 5687 (28.6%) |
| At least 1 | 375 (7.3%) | 6201 (70.5%) | 1315 (0.7%) | 33903 (30.4%) | 1679 (17.3%) | 14173 (71.4%) |
|  |  |  |  |  |  |  |
| **X-rays (among those with at least 1)** | | | | | | |
| N | 375 | 6201 | 1315 | 33903 | 1679 | 14173 |
| Mean (SD) | 1.19 (0.41) | 1.44 (0.57) | 1.15 (0.38) | 1.26 (0.47) | 1.19 (0.46) | 1.43 (0.66) |
| Median | 1 | 1 | 1 | 1 | 1 | 1 |
| Q1, Q3 | 1, 1 | 1, 2 | 1, 1 | 1, 1 | 1, 1 | 1, 2 |
| Range | (1-3) | (1-5) | (1-3) | (1-6) | (1-5) | (1-8) |
|  |  |  |  |  |  |  |
| **MRIs** | | | | | | |
| None | 4219 (82%) | 6647 (75.6%) | 191626 (98.6%) | 105375 (94.6%) | 6521 (67.2%) | 7377 (37.1%) |
| At least 1 | 923 (18%) | 2144 (24.4%) | 2775 (1.4%) | 5988 (5.4%) | 3181 (32.8%) | 12483 (62.9%) |
|  |  |  |  |  |  |  |
| **MRIs (among those with at least 1)** | | | | | | |
| N | 923 | 2144 | 2775 | 5988 | 3181 | 12483 |
| Mean (SD) | 1.45 (0.55) | 1.45 (0.53) | 1.39 (0.52) | 1.33 (0.49) | 1.52 (0.59) | 1.52 (0.57) |
| Median | 1 | 1 | 1 | 1 | 1 | 1 |
| Q1, Q3 | 1, 2 | 1, 2 | 1, 2 | 1, 2 | 1, 2 | 1, 2 |
| Range | (1-4) | (1-4) | (1-4) | (1-4) | (1-5) | (1-6) |
|  |  |  |  |  |  |  |
| **Arthrograms** | | | | | | |
| None | 5078 (98.8%) | 8675 (98.7%) | 194112 (99.9%) | 110952 (99.6%) | 9412 (97%) | 19204 (96.7%) |
| At least 1 | 64 (1.2%) | 116 (1.3%) | 289 (0.1%) | 411 (0.4%) | 290 (3%) | 656 (3.3%) |
|  |  |  |  |  |  |  |
| **Arthrograms (among those with at least 1)** | | | | | | |
| N | 64 | 116 | 289 | 411 | 290 | 656 |
| Mean (SD) | 1.25 (0.53) | 1.40 (0.60) | 1.15 (0.35) | 1.21 (0.41) | 1.24 (0.48) | 1.27 (0.46) |
| Median | 1 | 1 | 1 | 1 | 1 | 1 |
| Q1, Q3 | 1, 1 | 1, 2 | 1, 1 | 1, 1 | 1, 1 | 1, 2 |
| Range | (1-3) | (1-5) | (1-2) | (1-2) | (1-4) | (1-4) |
|  |  |  |  |  |  |  |
| **CT scans** | | | | | | |
| None | 5128 (99.7%) | 8687 (98.8%) | 194376 (100%) | 111157 (99.8%) | 9667 (99.6%) | 19669 (99%) |
| At least 1 | 14 (0.3%) | 104 (1.2%) | 25 (0%) | 206 (0.2%) | 35 (0.4%) | 191 (1%) |
|  |  |  |  |  |  |  |
| **CT scans (among those with at least 1)** | | | | | | |
| N | 14 | 104 | 25 | 206 | 35 | 191 |
| Mean (SD) | 1.29 (0.47) | 1.34 (0.49) | 1.44 (0.51) | 1.25 (0.43) | 1.51 (0.56) | 1.48 (0.53) |
| Median | 1 | 1 | 1 | 1 | 1 | 1 |
| Q1, Q3 | 1, 2 | 1, 2 | 1, 2 | 1, 1 | 1, 2 | 1, 2 |
| Range | (1-2) | (1-3) | (1-2) | (1-2) | (1-3) | (1-4) |
|  |  |  |  |  |  |  |
| **Advanced imaging (MRIs, arthrograms, CT scans)** | | | | | | |
| None | 4208 (81.8%) | 6547 (74.5%) | 191581 (98.5%) | 105157 (94.4%) | 6491 (66.9%) | 7235 (36.4%) |
| At least 1 | 934 (18.2%) | 2244 (25.5%) | 2820 (1.5%) | 6206 (5.6%) | 3211 (33.1%) | 12625 (63.6%) |
|  |  |  |  |  |  |  |
| **Advanced imaging (MRIs, arthrograms, CT scans) (among those with at least 1)** | | | | | | |
| N | 934 | 2244 | 2820 | 6206 | 3211 | 12625 |
| Mean (SD) | 1.54 (0.73) | 1.52 (0.67) | 1.50 (0.69) | 1.40 (0.62) | 1.64 (0.77) | 1.59 (0.68) |
| Median | 1 | 1 | 1 | 1 | 2 | 2 |
| Q1, Q3 | 1, 2 | 1, 2 | 1, 2 | 1, 2 | 1, 2 | 1, 2 |
| Range | (1-7) | (1-6) | (1-6) | (1-5) | (1-8) | (1-8) |
|  |  |  |  |  |  |  |
| **Imaging services** | | | | | | |
| X-ray only | 238 (4.6%) | 5137 (58.4%) | 1080 (0.6%) | 31603 (28.4%) | 605 (6.2%) | 5286 (26.6%) |
| Advanced imaging only | 797 (15.5%) | 1180 (13.4%) | 2585 (1.3%) | 3906 (3.5%) | 2137 (22%) | 3738 (18.8%) |
| X-ray 1st | 40 (0.8%) | 894 (10.2%) | 102 (0.1%) | 1974 (1.8%) | 429 (4.4%) | 7015 (35.3%) |
| Advanced imaging 1st | 92 (1.8%) | 160 (1.8%) | 108 (0.1%) | 275 (0.2%) | 604 (6.2%) | 1802 (9.1%) |
| X-ray and Advanced imaging (on index) | 5 (0.1%) | 10 (0.1%) | 25 (0%) | 51 (0%) | 41 (0.4%) | 70 (0.4%) |
| No imaging service | 3970 (77.2%) | 1410 (16%) | 190501 (98%) | 73554 (66%) | 5886 (60.7%) | 1949 (9.8%) |
| **Order of imaging services (after excluding those without imaging services)** | | | | | | |
| Missing | 3970 (.%) | 1410 (.%) | 190501 (.%) | 73554 (.%) | 5886 (.%) | 1949 (.%) |
| X-ray only | 238 (20.3%) | 5137 (69.6%) | 1080 (27.7%) | 31603 (83.6%) | 605 (15.9%) | 5286 (29.5%) |
| Advanced imaging only | 797 (68%) | 1180 (16%) | 2585 (66.3%) | 3906 (10.3%) | 2137 (56%) | 3738 (20.9%) |
| X-ray 1st | 40 (3.4%) | 894 (12.1%) | 102 (2.6%) | 1974 (5.2%) | 429 (11.2%) | 7015 (39.2%) |
| Advanced imaging 1st | 92 (7.8%) | 160 (2.2%) | 108 (2.8%) | 275 (0.7%) | 604 (15.8%) | 1802 (10.1%) |
| X-ray and Advanced imaging (on index) | 5 (0.4%) | 10 (0.1%) | 25 (0.6%) | 51 (0.1%) | 41 (1.1%) | 70 (0.4%) |
